# Supplementary material for: Kinetic investigation on the highly efficient and selective oxidation of sulfides to sulfoxides and sulfones with t-BuOOH catalyzed by La2O3
Source: Royal Society of Chemistry journal article supplement (doi:10.1039/c4ra14391d), 2015-01-01
Supplement: c4ra14391d1.pdf [file c4ra14391d1.pdf]

## Supplementary information

### **Kinetic investigation on the highly efficient and selective oxidation of sulfides to sulfoxides and sulfones with *t*-BuOOH catalyzed by La<sub>2</sub>O<sub>3</sub>**

Mrinmay Mandal<sup>a</sup> and Debashis Chakraborty<sup>a\*</sup>

<sup>a</sup>*Department of Chemistry, Indian Institute of Technology Patna, Patna-800 013, Bihar, India*

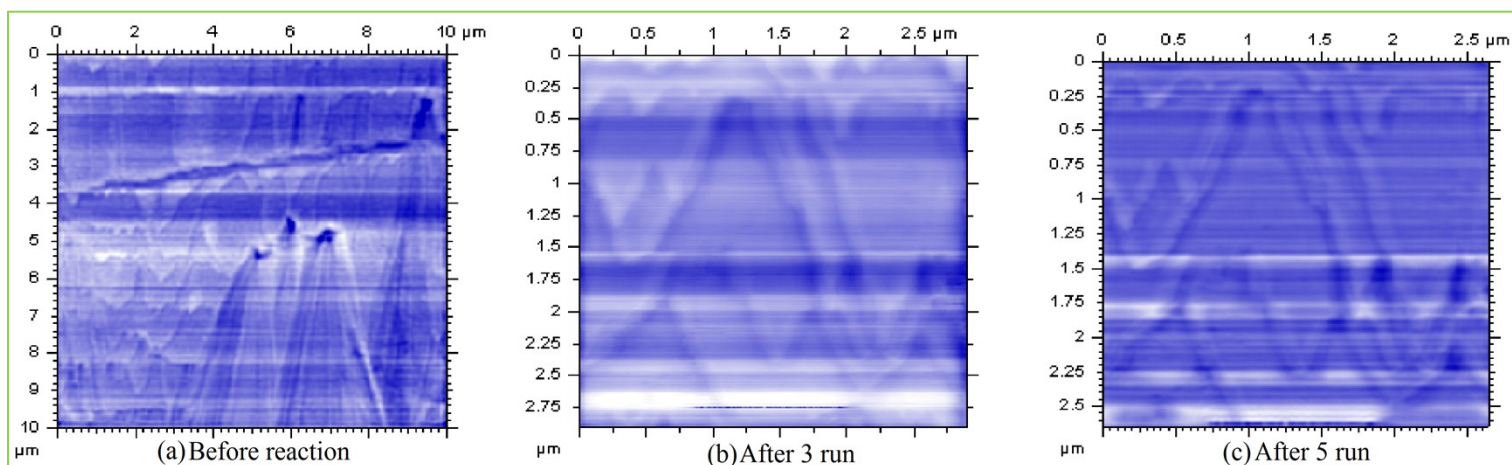

**Fig. S1** AFM images of the catalyst: (a) before reaction, (b) after 3 run, and (c) after 5 run.

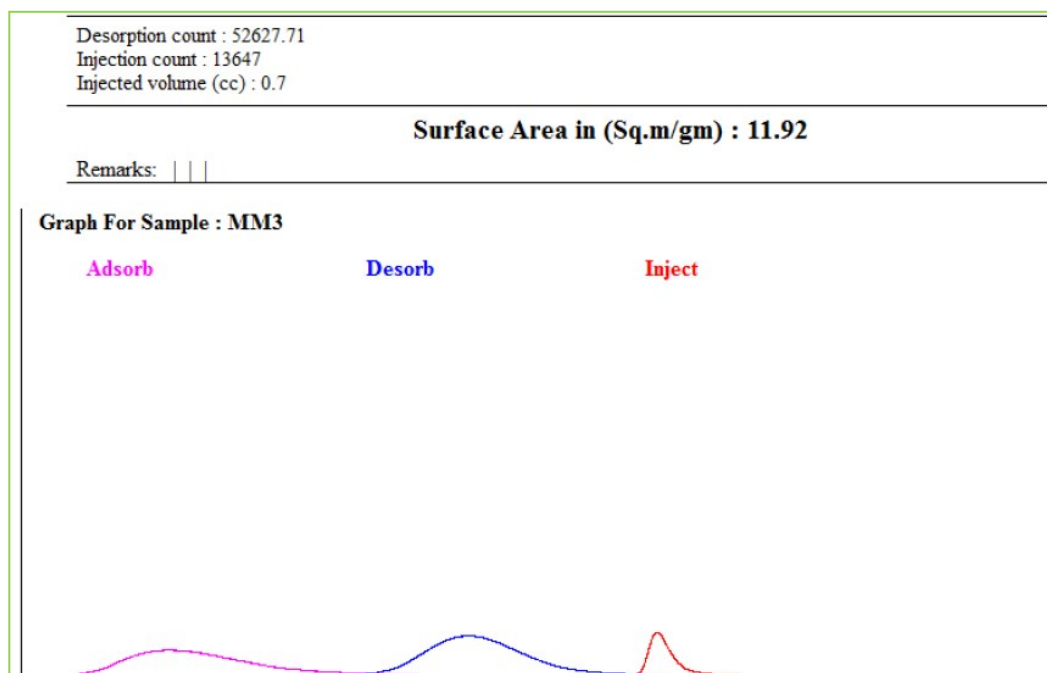

**Fig. S2** Brunauer–Emmett–Teller (BET) surface area study of  $\text{La}_2\text{O}_3$ .
